# Supplementary material for: Synthesis of dual emitting iodocuprates: can solvents switch the reaction outcome?
Source: Royal Society of Chemistry journal article supplement (doi:10.1039/d0qi00346h), 2020-01-01
Supplement: d0qi00346h2.pdf [file d0qi00346h2.pdf]

## Supporting Information

### Synthesis of dual emitting iodocuprates: can solvent switch the reaction outcome?

Alexander V. Artem'ev,<sup>\*a</sup> Alexey S. Berezin,<sup>a</sup> Ilya V. Taidakov,<sup>b</sup> Irina Yu. Bagryanskaya<sup>c</sup>

<sup>a</sup> Nikolaev Institute of Inorganic Chemistry, Siberian Branch of Russian Academy of Sciences, Acad. Lavrentiev Ave., 3, 630090 Novosibirsk, Russian Federation

<sup>b</sup> P.N. Lebedev Physical Institute of Russian Academy of Sciences, Leninskiy Prospekt, 53, 119991 Moscow, Russian Federation

<sup>c</sup> N. N. Vorozhtsov Novosibirsk Institute of Organic Chemistry, Siberian Branch of Russian Academy of Sciences, Acad. Lavrentiev Ave., 9, 630090 Novosibirsk, Russian Federation

\*E-mail: [chemisufarm@yandex.ru](mailto:chemisufarm@yandex.ru) (Alexander V. Artem'ev)

### Table of Contents

#### Pages

|    |                                                                                                                                                                                                     |
|----|-----------------------------------------------------------------------------------------------------------------------------------------------------------------------------------------------------|
| S2 | X-Ray crystallography data                                                                                                                                                                          |
| S2 | <b>Table S1.</b> Crystal data and structure refinement for <b>1</b> , <b>LT-1</b> , <b>2</b> , and <b>LT-2</b> .                                                                                    |
| S3 | <b>Figure S1.</b> Experimental and simulated PXRD patterns of as-made samples of <b>1</b> and <b>2</b> .                                                                                            |
| S3 | <b>Figure S2.</b> <sup>1</sup> H NMR spectrum of <b>[Me-PySMe]I</b> (CD <sub>3</sub> CN).                                                                                                           |
| S3 | <b>Figure S3.</b> <sup>13</sup> C NMR spectrum of <b>[Me-PySMe]I</b> (CD <sub>3</sub> CN).                                                                                                          |
| S4 | <b>Figure S4.</b> FT-IR spectra of <b>1</b> , <b>2</b> and <b>[Me-PySMe]I</b> showed in the fingerprint region.                                                                                     |
| S4 | <b>Figure S5.</b> TGA&DTG curves for <b>1</b> and <b>2</b> .                                                                                                                                        |
| S5 | <b>Figure S6.</b> Temperature dependent excitation spectra of <b>2</b> recorded for (a) HE emission band ( $\lambda_{\text{em}} = 600$ nm); (b) LE emission band ( $\lambda_{\text{em}} = 660$ nm). |
| S5 | <b>Figure S7.</b> Temperature dependence of the LE emission lifetimes of <b>2</b> ( $\lambda_{\text{ex}} = 390$ nm).                                                                                |
| S5 | <b>Figure S8.</b> The $I_{\text{HE}}/I_{\text{LE}}$ integral ratio of <b>1</b> as a function of temperature.                                                                                        |
| S6 | <b>Figure S9.</b> The $I_{\text{HE}}/I_{\text{LE}}$ integral ratio of <b>2</b> as a function of temperature.                                                                                        |
| S6 | <b>Figure S10.</b> Thermochromic luminescence of <b>1</b> ( <i>left</i> ) and <b>2</b> ( <i>right</i> ).                                                                                            |

## X-Ray crystallography data

Single crystals of **1** were grown by slow evaporation of an acetonitrile solution at room temperature for overnight. Crystals of **2** were obtained in a similar way using an acetone solution. The data were collected on a Bruker Kappa Apex II CCD diffractometer using  $\phi, \omega$ -scans of narrow ( $0.5^\circ$ ) frames with MoK $\alpha$  radiation ( $\lambda = 0.71073 \text{ \AA}$ ) and a graphite monochromator. Experiments were carried out both at 296 K (structures **1** and **2**) and at a low temperature (structures **LT-1** and **LT-2**). The structures were solved by direct method and refined by a full matrix least-squares anisotropic-isotropic (for H atoms) procedure using *SHELXL-2014/7* program set.<sup>[1]</sup> Absorption corrections were applied using the empirical multiscan method with the *SADABS* program.<sup>[2]</sup> The positions of the hydrogen atoms were calculated with the riding model. The crystallographic data and details of the structure refinements are summarized in Table S1.

**Table S1.** Crystal data and structure refinement for **1**, **LT-1**, **2**, and **LT-2**.

|                                                                                                                         | <b>1</b>                                                         | <b>LT-1</b>                                                      | <b>2</b>                                                         | <b>LT-2</b>                                                      |
|-------------------------------------------------------------------------------------------------------------------------|------------------------------------------------------------------|------------------------------------------------------------------|------------------------------------------------------------------|------------------------------------------------------------------|
| CCDC number                                                                                                             | 1980260                                                          | 1980261                                                          | 1980262                                                          | 1980263                                                          |
| Chemical formula                                                                                                        | C <sub>7</sub> H <sub>10</sub> Cu <sub>2</sub> I <sub>3</sub> NS | C <sub>7</sub> H <sub>10</sub> Cu <sub>2</sub> I <sub>3</sub> NS | C <sub>7</sub> H <sub>10</sub> Cu <sub>2</sub> I <sub>3</sub> NS | C <sub>7</sub> H <sub>10</sub> Cu <sub>2</sub> I <sub>3</sub> NS |
| <i>M<sub>r</sub></i>                                                                                                    | 648.00                                                           | 648.00                                                           | 552.78                                                           | 552.78                                                           |
| Crystal system, space group                                                                                             | Triclinic, <i>P</i> $\bar{1}$                                    | Triclinic, <i>P</i> $\bar{1}$                                    | Monoclinic, <i>C2/c</i>                                          | Monoclinic, <i>C2/c</i>                                          |
| Temperature (K)                                                                                                         | 296                                                              | 150                                                              | 296                                                              | 173                                                              |
| <i>a</i> , <i>b</i> , <i>c</i> (Å)                                                                                      | 8.3955(6), 8.8269(6), 10.2082(7)                                 | 8.3509(5), 8.6611(5), 10.1643(6)                                 | 17.1423(7), 12.6156(5), 14.4514(9)                               | 17.0938(6), 12.5931(3), 14.2965(5)                               |
| $\alpha$ , $\beta$ , $\gamma$ (°)                                                                                       | 83.171(3), 80.856(3), 78.317(3)                                  | 83.349(2), 81.897(2), 78.881(2)                                  | 90, 125.098(2), 90                                               | 90, 125.166(1), 90                                               |
| <i>V</i> (Å <sup>3</sup> )                                                                                              | 728.46(9)                                                        | 711.18(7)                                                        | 2557.0(2)                                                        | 2515.83(14)                                                      |
| <i>Z</i>                                                                                                                | 2                                                                | 2                                                                | 8                                                                | 8                                                                |
| $\mu$ (mm <sup>-1</sup> )                                                                                               | 9.39                                                             | 9.62                                                             | 8.68                                                             | 8.82                                                             |
| Crystal size (mm)                                                                                                       | 0.50 × 0.30 × 0.10                                               | 0.35 × 0.22 × 0.06                                               | 0.35 × 0.10 × 0.02                                               | 0.15 × 0.15 × 0.10                                               |
| <i>T<sub>min</sub></i> , <i>T<sub>max</sub></i>                                                                         | 0.578, 0.862                                                     | 0.510, 0.928                                                     | 0.618, 0.928                                                     | 0.510, 0.928                                                     |
| No. of measured, independent and observed [ <i>I</i> > 2 $\sigma$ ( <i>I</i> )] reflections                             | 10792, 3290, 2575                                                | 12728, 3745, 3186                                                | 29378, 3740, 3223                                                | 15875, 4593, 3941                                                |
| <i>R<sub>int</sub></i>                                                                                                  | 0.022                                                            | 0.033                                                            | 0.044                                                            | 0.049                                                            |
| ( <i>sin</i> $\theta$ / $\lambda$ ) <sub>max</sub> (Å <sup>-1</sup> )                                                   | 0.650                                                            | 0.704                                                            | 0.705                                                            | 0.759                                                            |
| <i>R</i> [ <i>F</i> <sup>2</sup> > 2 $\sigma$ ( <i>F</i> <sup>2</sup> )], <i>wR</i> ( <i>F</i> <sup>2</sup> ), <i>S</i> | 0.046, 0.133, 1.01                                               | 0.031, 0.075, 1.03                                               | 0.033, 0.083, 1.03                                               | 0.030, 0.078, 1.03                                               |
| No. of reflections                                                                                                      | 3290                                                             | 3745                                                             | 3740                                                             | 4593                                                             |
| No. of parameters                                                                                                       | 139                                                              | 139                                                              | 121                                                              | 121                                                              |
| $\Delta$ <sub>max</sub> , $\Delta$ <sub>min</sub> (e Å <sup>-3</sup> )                                                  | 2.31, -1.63                                                      | 1.92, -1.53                                                      | 1.96, -2.14                                                      | 2.42, -2.93                                                      |

<sup>[1]</sup> G. M. Sheldrick, *Acta Crystallogr., Sect. C: Struct. Chem.*, **2015**, *71*, 3–8.

<sup>[2]</sup> *SADABS*, v. 2008-1, Bruker AXS, Madison, WI, USA, 2008.

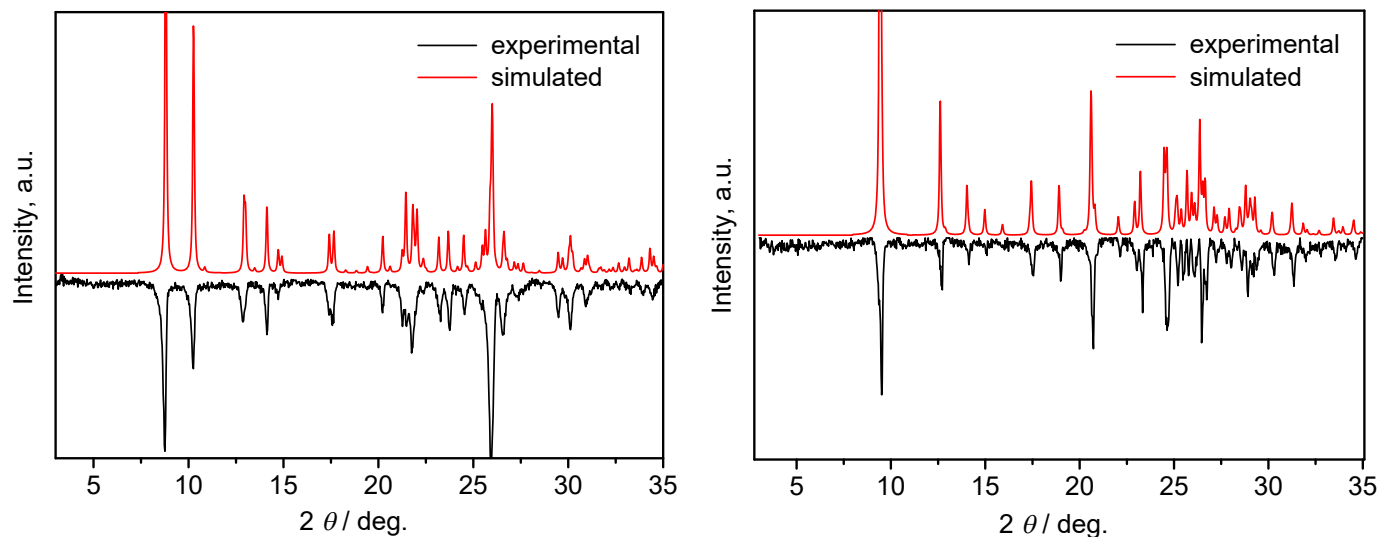

**Figure S1.** Experimental and simulated PXRD patterns of as-made samples of **1** (left) and **2**.

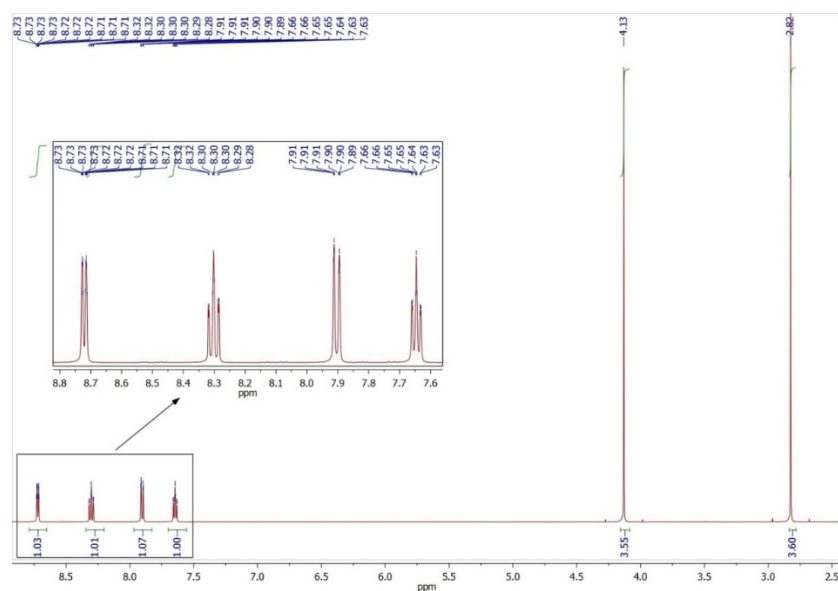

**Figure S2.**  $^1\text{H}$  NMR spectrum of **[Me-PySMe]I** ( $\text{CD}_3\text{CN}$ ).

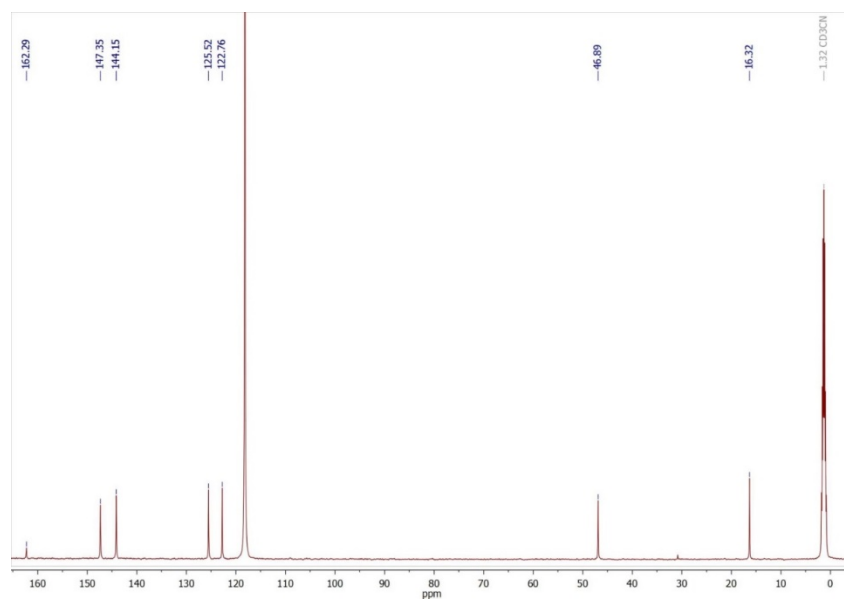

**Figure S3.**  $^{13}\text{C}$  NMR spectrum of **[Me-PySMe]I** ( $\text{CD}_3\text{CN}$ ).

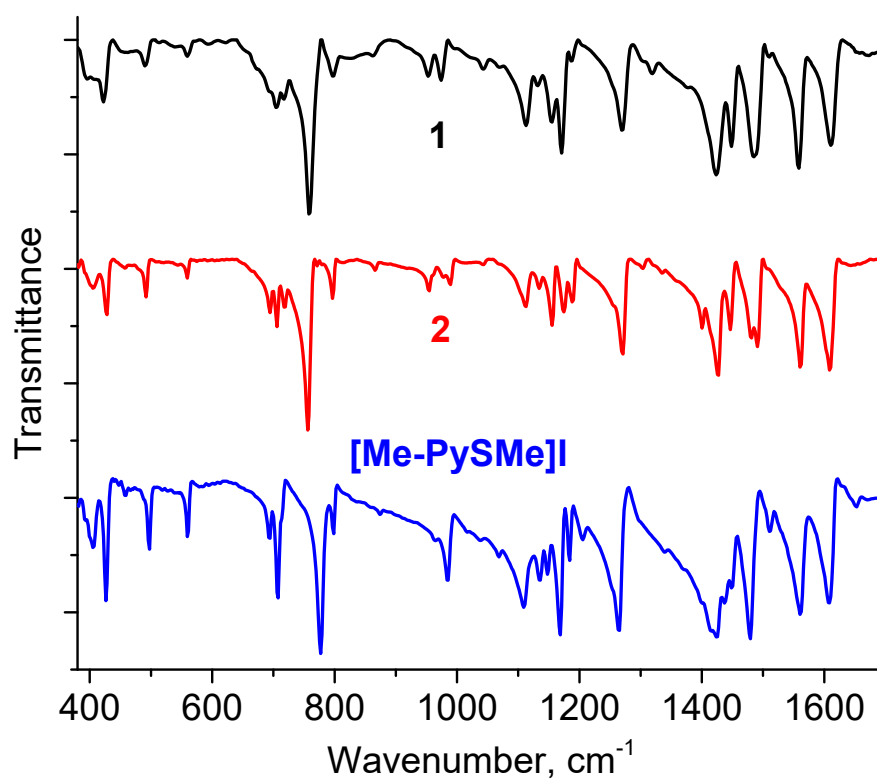

**Figure S4.** FT-IR spectra of **1**, **2** and **[Me-PySMe]I** showed in the fingerprint region.

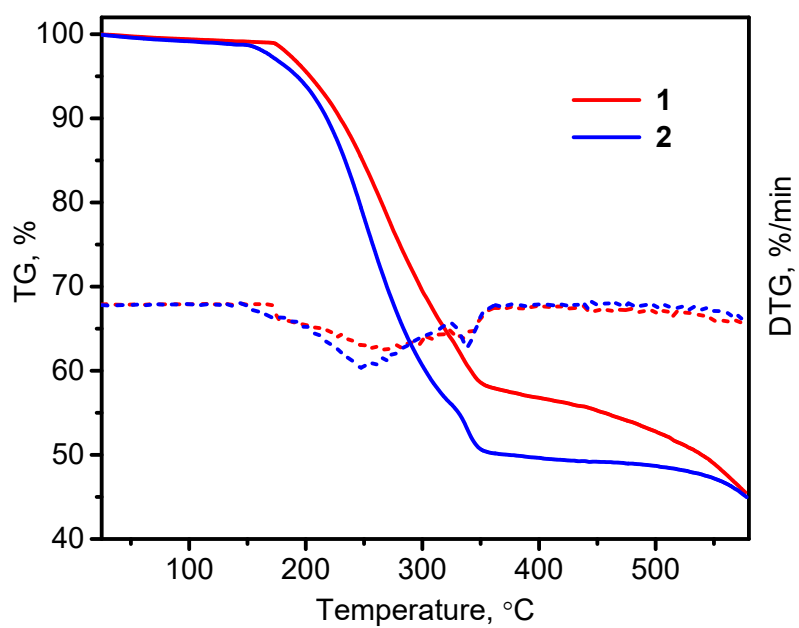

**Figure S5.** TGA&DTG curves for **1** and **2**.

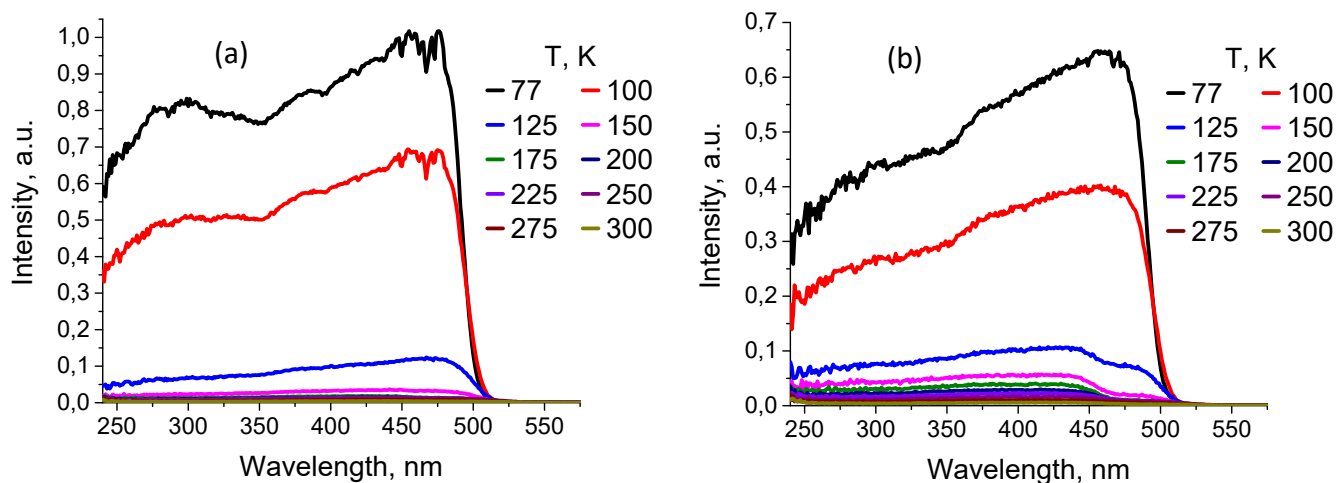

**Figure S6.** Temperature dependent excitation spectra of **2** recorded for (a) HE emission band ( $\lambda_{em} = 600$  nm); (b) LE emission band ( $\lambda_{em} = 660$  nm).

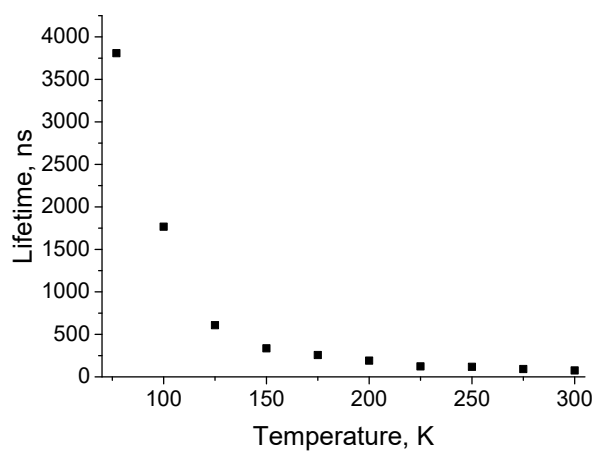

**Figure S7.** Temperature dependence of the LE emission lifetimes of **2** ( $\lambda_{ex} = 390$  nm).

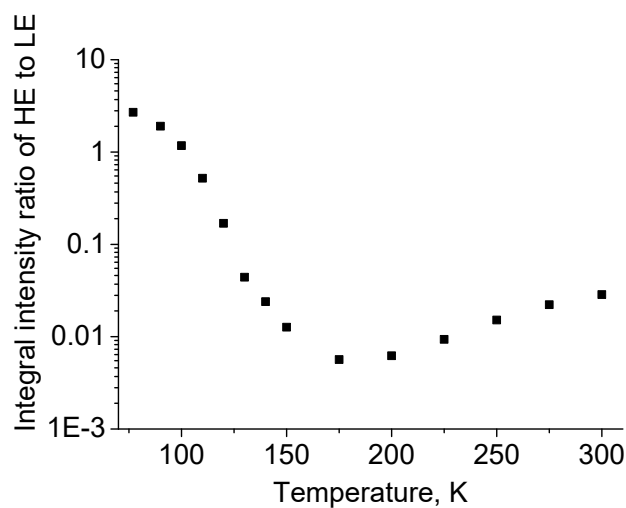

**Figure S8.** The  $I_{HE}/I_{LE}$  integral ratio of **1** as a function of temperature.

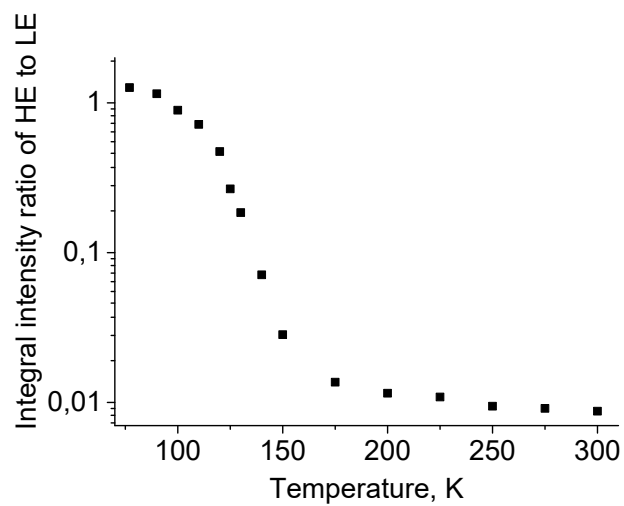

**Figure S9.** The  $I_{\text{HE}}/I_{\text{LE}}$  integral ratio of **2** as a function of temperature.

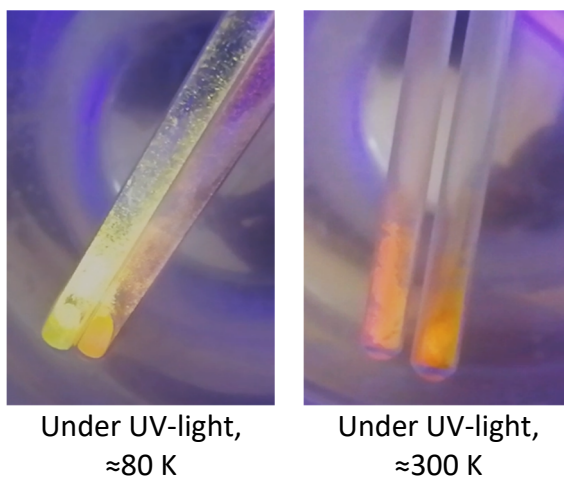

**Figure S10.** Thermochromic luminescence of **1** (*left*) and **2** (*right*).
